# Supplementary material for: Mercurophilic interactions: a theoretical study on the importance of ligands
Source: Royal Society of Chemistry journal article supplement (doi:10.1039/c7cp00542c), 2017-01-01
Supplement: c7cp00542c1.pdf [file c7cp00542c1.pdf]

## **Mercurophilic Interactions: A Theoretical Study on the Importance of the Ligands**

Jorge Echeverría\*, Jordi Cirera and Santiago Alvarez

Departament de Química Inorgànica i Orgànica (Secció d'Inorgànica) and  
Institut de Química Teòrica i Computacional (IQTUB),  
Universitat de Barcelona, Martí i Franquès 1-11, 08028 Barcelona (Spain).

SUPPORTING INFORMATION

| Refcode  | X                             | Y                 | Hg...Hg (Å) |           | $\tau$ (°) | Supp. contacts | d (Å)       |
|----------|-------------------------------|-------------------|-------------|-----------|------------|----------------|-------------|
| doyfig*  | SR                            | Me                | 3.099       | Hg1...Hg1 | 81.8       |                |             |
| tmsihg01 | SiMe <sub>3</sub>             | SiMe <sub>3</sub> | 3.146       | Hg1...Hg1 | 83.5       | H...H          | 2.5 - 2.6   |
| pehgme10 | RNH <sub>2</sub> <sup>+</sup> | Me                | 3.346       | Hg2...Hg2 | 75.1       |                |             |
| duvkio   | N-het <sup>†</sup>            | Me                | 3.347       | Hg2...Hg2 | 60.5       |                |             |
| lasraz   | SR                            | SR                | 3.485       | Hg1...Hg1 | 73.8       | stacking       | 3.52        |
| jespec   | N-het                         | Me                | 3.510       | Hg2...Hg3 | 86.6       | 1 N...Hg       | 2.82        |
| ricliy   | N-het                         | Ph                | 3.519       | Hg1...Hg4 | 60.0       |                |             |
| dbezhg   | Bz                            | Bz                | 3.538       | Hg1...Hg1 | 90.0       | 2 Ph...Hg      | 3.20        |
| hahqen   | Cl                            | R                 | 3.275       | Hg1...Hg2 | 76.7       | 4 O...Hg       | 2.8 - 2.9   |
| dojsaw   | N-het                         | Me                | 3.514       | Hg1...Hg2 | 41.9       | 2 O...Hg       | 2.99        |
| evojad   | Cb <sup>‡</sup>               | Cb                | 3.524       | Hg1...Hg2 | 73.9       | 4 O...Hg       | 2.8         |
| nevdat   | OOCR                          | OOCR              | 3.557       | Hg5...Hg9 | 42.9       | 2 O...Hg       | 2.9 - 3.0   |
| bespaq   | Imino                         | Ph                | 3.582       | Hg1...Hg2 | 86.5       | 2 O...Hg       | 2.92        |
| kapwut   | SR                            | Me                | 3.671       | Hg1...Hg1 | 53.7       | 1 N...Hg       | 2.76        |
| kayreh   | OOCR                          | Ph                | 3.859       | Hg1...Hg1 | 61.1       | 2 O...Hg       | 2.88        |
| eyojeh   | Cb                            | Cb                | 3.872       | Hg1...Hg2 | 76.1       | 4 O...Hg       | 2.9         |
| nevdat   | OOCR                          | R                 | 3.891       | Hg4...Hg9 | 35.3       | 2 O...Hg       | 3.0         |
| joptud   | R                             | Cl                | 3.900       | Hg1...Hg1 | 31.0       | 4 Cl...Hg      | 3.26, 3.87  |
| duvkio   | N-het                         | Me                | 3.924       | Hg1...Hg1 | 38.3       | 2 O...Hg       | 3.0         |
| eyojil   | Cb                            | Cb                | 3.976       | Hg1...Hg2 | 87.9       | 4 O...Hg       | 2.79 - 2.89 |
| cizvem   | Amido                         | Ph                | 4.096       | Hg1...Hg1 | 79.8       | 1 O...Hg       | 2.87        |
| nevdat   | OOCR                          | R                 | 4.103       | Hg2...Hg6 | 38.2       | 2 O...Hg       | 2.9         |
| jucfes   | N-het                         | Me                | 4.114       | Hg1...Hg1 | 72.0       | 2 N...Hg       | 3.08        |

\*In the same compound one can find an intermolecular interaction of type **2b** (see Table 1) at 3.805 Å between two Hg2 atoms. † N-heterocycle. ‡ Carbene.

**TableS1.** Bimolecular association of [XHgY] complexes of type **2a**. Non-equivalent crystallographic Hg atoms are labelled with numbers.

| Refcode  | Xa  | Yb  | Ya  | Xb  | Xa-Yb (Å) | Ya-Xb (Å) | Hg  | Hg' | Hg...Hg (Å) |
|----------|-----|-----|-----|-----|-----------|-----------|-----|-----|-------------|
| ocifem   | C18 | C17 | C17 | C18 | 3.691     | 3.691     | Hg2 | Hg2 | 3.621       |
| volfor   | S2  | S1  | S1  | S2  | 3.641     | 3.641     | Hg1 | Hg1 | 3.691       |
| mirlaa   | C1  | S1  | S1  | C1  | 3.531     | 3.531     | Hg1 | Hg1 | 3.697       |
| admehh   | C9  | N9  | N9  | C9  | 3.676     | 3.676     | Hg9 | Hg9 | 3.701       |
| yulfao   | C1  | C9  | Se1 | Se2 | 3.984     | 3.637     | Hg1 | Hg2 | 3.721       |
| vewtia   | C6  | C6  | N4  | N4  | 3.761     | 3.761     | Hg1 | Hg1 | 3.761       |
| rocgiz   | C5  | N5  | N5  | C5  | 3.675     | 3.675     | Hg1 | Hg1 | 3.764       |
| mehgcn01 | C2  | C1  | C1  | C2  | 3.839     | 3.839     | Hg1 | Hg1 | 3.771       |
| qugvod   | C1  | C15 | S1  | S2  | 4.024     | 3.617     | Hg1 | Hg2 | 3.773       |
| faknag   | C7  | N5  | N5  | C7  | 3.763     | 3.763     | Hg2 | Hg2 | 3.796       |
| kabgoj   | C7  | N1  | N1  | C7  | 3.747     | 3.747     | Hg1 | Hg1 | 3.796       |
| bzhgcl   | Cl2 | C8  | C8  | Cl2 | 3.817     | 3.846     | Hg2 | Hg2 | 3.805       |
| doyfig   | C6  | S1  | S1  | C6  | 3.840     | 3.840     | Hg1 | Hg1 | 3.805       |
| pucdew   | C15 | N3  | N3  | C15 | 3.801     | 3.801     | Hg1 | Hg1 | 3.814       |
| bzhgcl   | Cl1 | C1  | C1  | Cl1 | 3.857     | 3.910     | Hg1 | Hg1 | 3.817       |
| penkup   | C1  | C15 | C2  | C14 | 3.881     | 3.727     | Hg1 | Hg2 | 3.866       |
| xemtug   | Cl5 | C12 | C12 | Cl5 | 3.983     | 3.983     | Hg3 | Hg3 | 3.890       |

|          |     |     |     |     |       |       |     |     |       |
|----------|-----|-----|-----|-----|-------|-------|-----|-----|-------|
| penmHg10 | C6  | C6  | S1  | S1  | 3.804 | 3.956 | Hg1 | Hg1 | 3.917 |
| yevcim   | C1  | C15 | C2  | C14 | 3.728 | 3.978 | Hg1 | Hg2 | 3.963 |
| jagyar   | C7  | N5  | N5  | C7  | 3.881 | 3.881 | Hg2 | Hg2 | 3.964 |
| cavhem10 | C16 | N6  | N6  | C16 | 4.136 | 4.136 | Hg4 | Hg4 | 3.969 |
| yikzex   | C19 | C17 | C17 | C19 | 3.924 | 3.924 | Hg2 | Hg2 | 4.009 |
| dofniw   | C1  | C1  | S1  | S1  | 4.193 | 3.642 | Hg1 | Hg1 | 4.013 |
| fadvai   | C12 | S2  | S2  | C12 | 3.721 | 4.376 | Hg2 | Hg2 | 4.108 |
| xujluj   | C14 | C13 | C13 | C14 | 4.110 | 4.110 | Hg2 | Hg2 | 4.115 |

**Table S2.** Structures showing unsupported Hg...Hg contacts with the parallel conformation **2b**.

| Refcode  | Hg1...X2 | Hg2...X1 | Hg...Hg | Hg1 | X1  | Hg2 | X2  | XHg-HgX |
|----------|----------|----------|---------|-----|-----|-----|-----|---------|
| BUCNUJ   | 3.112    | 3.112    | 3.669   | Hg1 | S2  | Hg1 | S2  | 0.56    |
| FEZLIF   | 2.923    | 2.934    | 3.732   | Hg1 | O1  | Hg2 | O3  | 0.80    |
| LILWEI   | 3.111    | 3.111    | 3.791   | Hg1 | Cl2 | Hg1 | Cl2 | 0.68    |
| FMHGIC   | 2.880    | 2.880    | 3.833   | Hg1 | N1  | Hg1 | N1  | 0.95    |
| ISICES   | 2.689    | 2.689    | 3.843   | Hg1 | O1  | Hg1 | O1  | 1.15    |
| AQAMOV   | 3.135    | 3.135    | 3.857   | Hg1 | N2  | Hg1 | N2  | 0.72    |
| CBPPHG   | 2.858    | 2.858    | 3.857   | Hg1 | O1  | Hg1 | O1  | 1.00    |
| FMHGAZ   | 2.739    | 2.739    | 3.859   | Hg1 | N1  | Hg1 | N1  | 1.12    |
| BUCNUJ   | 3.037    | 3.037    | 3.869   | Hg1 | S1  | Hg1 | S1  | 0.83    |
| VUDSUJ   | 2.953    | 3.060    | 3.889   | Hg2 | Cl4 | Hg3 | Cl5 | 0.83    |
| VUDSUJ   | 3.044    | 3.104    | 3.890   | Hg3 | Cl6 | Hg2 | Cl3 | 0.79    |
| CPCOMC   | 3.141    | 3.141    | 3.918   | Hg1 | Cl1 | Hg1 | Cl1 | 0.78    |
| UJUHIR   | 2.989    | 3.062    | 3.937   | Hg5 | Se9 | Hg4 | Se6 | 0.88    |
| VOFTEQ   | 2.798    | 2.798    | 3.939   | Hg1 | O1  | Hg1 | O1  | 1.14    |
| ISICAO   | 2.885    | 2.794    | 3.958   | Hg1 | O1  | Hg2 | O3  | 1.16    |
| HGCETS   | 3.058    | 3.058    | 3.963   | Hg2 | Cl2 | Hg2 | Cl2 | 0.91    |
| KELWED   | 3.172    | 3.172    | 3.972   | Hg1 | S2  | Hg1 | S2  | 0.80    |
| BITHIV10 | 3.102    | 3.102    | 4.000   | Hg1 | Cl2 | Hg1 | Cl2 | 0.90    |
| VAVGAA   | 3.105    | 3.105    | 4.002   | Hg1 | Cl1 | Hg1 | Cl1 | 0.90    |
| FAWKUJ   | 3.106    | 3.106    | 4.003   | Hg4 | O14 | Hg4 | O14 | 0.90    |
| XOBTEP   | 3.145    | 3.145    | 4.024   | Hg1 | Cl1 | Hg1 | Cl1 | 0.88    |
| PHHGAC01 | 2.994    | 2.994    | 4.028   | Hg1 | O1  | Hg1 | O1  | 1.03    |
| PHHGAC   | 2.943    | 2.943    | 4.032   | Hg1 | O1  | Hg1 | O1  | 1.09    |
| XAWXUP   | 2.907    | 2.907    | 4.074   | Hg1 | O1  | Hg1 | O1  | 1.17    |
| KEZGUS   | 3.127    | 3.127    | 4.077   | Hg1 | Cl1 | Hg1 | Cl1 | 0.95    |
| AXUDUT   | 3.178    | 3.137    | 4.077   | Hg2 | Cl2 | Hg3 | Cl3 | 0.94    |
| ZOPZIN   | 2.916    | 2.916    | 4.081   | Hg1 | O3  | Hg1 | O3  | 1.17    |
| JOTXIZ   | 3.177    | 3.177    | 4.087   | Hg1 | Cl2 | Hg1 | Cl2 | 0.91    |
| VAVGAA   | 3.177    | 3.177    | 4.100   | Hg2 | Cl2 | Hg2 | Cl2 | 0.92    |
| TEVQOA01 | 3.135    | 3.135    | 4.104   | Hg1 | S1  | Hg1 | S1  | 0.97    |
| LEZFEB   | 3.123    | 3.123    | 4.122   | Hg1 | Cl1 | Hg1 | Cl1 | 1.00    |
| PIFNAT   | 3.000    | 3.000    | 4.122   | Hg1 | O2  | Hg1 | O2  | 1.12    |
| QUGVAP   | 3.146    | 3.146    | 4.124   | Hg1 | S1  | Hg1 | S1  | 0.98    |
| PHGTFA01 | 2.951    | 2.951    | 4.131   | Hg1 | O1  | Hg1 | O1  | 1.18    |

|          |       |       |       |     |     |     |     |      |
|----------|-------|-------|-------|-----|-----|-----|-----|------|
| GUKHEZ   | 3.163 | 3.163 | 4.139 | Hg1 | Cl1 | Hg1 | Cl1 | 0.98 |
| BIJDAZ   | 3.136 | 3.143 | 4.143 | Hg2 | Cl2 | Hg4 | Cl4 | 1.00 |
| BZHGCL   | 3.190 | 3.176 | 4.144 | Hg1 | Cl1 | Hg2 | Cl2 | 0.97 |
| CIDZOF   | 3.095 | 3.095 | 4.177 | Hg2 | Cl2 | Hg2 | Cl2 | 1.08 |
| HALCIG   | 3.188 | 3.188 | 4.183 | Hg1 | Cl1 | Hg1 | Cl1 | 0.99 |
| CIDZOF   | 3.173 | 3.173 | 4.192 | Hg1 | Cl1 | Hg1 | Cl1 | 1.02 |
| KASDAJ01 | 3.129 | 3.129 | 4.199 | Hg1 | P2  | Hg1 | P2  | 1.07 |
| KASDAJ   | 3.162 | 3.162 | 4.221 | Hg1 | P2  | Hg1 | P2  | 1.06 |
| WUZWAP   | 3.156 | 3.156 | 4.245 | Hg2 | Cl2 | Hg2 | Cl2 | 1.09 |
| KAYREH   | 3.057 | 3.057 | 4.263 | Hg1 | O1  | Hg1 | O1  | 1.21 |
| HEHKEM   | 3.072 | 3.072 | 4.364 | Hg1 | O1  | Hg1 | O1  | 1.29 |
| REWTES   | 2.899 | 2.899 | 4.379 | Hg4 | O10 | Hg4 | O10 | 1.48 |

**Table S3.** Structures showing Hg...Hg contacts with the slipped conformation **2c**. Distances are given in Angstroms and angles in degrees.

| Topology  | Basis set   | $d_{\text{Hg}\cdots\text{Hg}}$ (Å) | $d_{\text{H}\cdots\text{Hg}}$ (Å) | DE (kcal/mol) |
|-----------|-------------|------------------------------------|-----------------------------------|---------------|
| <b>2a</b> | Def2-TZVPD  | 3.240                              | 3.625                             | 1.41          |
|           | Def2-TZVPPD | 3.205                              | 3.590                             | 2.18          |
|           | Def2-QZVPD  | 3.141                              | 3.534                             | 2.68          |
|           | Def2-QZVPPD | 3.078                              | 3.479                             | 3.01          |
| <b>2b</b> | Def2-TZVPD  | 3.536                              | 3.891                             | 0.48          |
|           | Def2-TZVPPD | 3.507                              | 3.861                             | 0.94          |
|           | Def2-QZVPD  | 3.442                              | 3.801                             | 1.24          |
|           | Def2-QZVPPD | 3.361                              | 3.731                             | 1.42          |
| <b>2c</b> | Def2-TZVPD  | 3.535                              | 3.038                             | 1.53          |
|           | Def2-TZVPPD | 3.463                              | 2.949                             | 2.21          |
|           | Def2-QZVPD  | 3.393                              | 2.880                             | 2.69          |
|           | Def2-QZVPPD | 3.333                              | 2.837                             | 2.94          |

**Table S4.** Dissociation energies and key structural parameters of (HgH<sub>2</sub>)<sub>2</sub> dimers with topologies **2a-c** calculated at the MP2 level of theory (All reported energies are BSSE corrected).

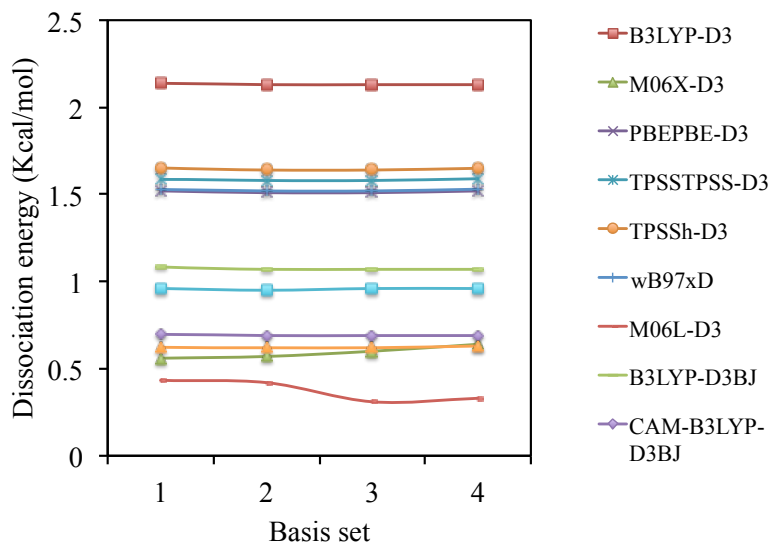

**Figure S1.** Effect of the basis sets on the dissociation energies for  $\text{HgH}_2$  parallel dimers calculated at the DFT level with several functionals. Basis set 1: Def2-TZVPPD; Basis set 2: Def2-TZVPPD; Basis set 3: Def2-QZVPD; Basis set 4: Def2-QZVPPD.

| Method         | DE (kcal/mol) | $d_{\text{Hg}\cdots\text{Hg}}$ (Å) |
|----------------|---------------|------------------------------------|
| B3LYP-D3       | 2.99          | 3.707                              |
| B3LYP-D3BJ     | 1.46          | 3.532                              |
| PBEPBE-D3      | 2.43          | 3.495                              |
| PBEPBE-D3BJ    | 2.48          | 3.305                              |
| TPSSTPSS-D3    | 2.37          | 3.644                              |
| TPSSh-D3       | 2.45          | 3.663                              |
| wB97xD         | 2.27          | 3.612                              |
| M06L-D3        | 1.72          | 3.340                              |
| M062X-D3       | 1.99          | 3.385                              |
| LC-wPBE-D3BJ   | 1.23          | 3.470                              |
| CAM-B3LYP-D3BJ | 1.28          | 3.498                              |

**Table S5.** Dissociation energies and key structural parameters of  $(\text{HgH}_2)_2$  dimers with topology **2a** calculated at DFT level of theory (BSSE corrected). The basis set Def2-TZVPPD was used for all functionals.

| Method      | DE (kcal/mol) | $d_{\text{Hg}\cdots\text{Hg}}$ (Å) |
|-------------|---------------|------------------------------------|
| B3LYP-D3    | 2.13          | 3.822                              |
| B3LYP-D3BJ  | 1.07          | 3.838                              |
| PBEPBE-D3   | 1.51          | 3.783                              |
| PBEPBE-D3BJ | 0.95          | 3.764                              |
| TPSSTPSS-D3 | 1.58          | 3.849                              |
| TPSSh-D3    | 1.64          | 3.840                              |
| wB97xD      | 1.52          | 4.015                              |
| M06L-D3     | 0.42          | 3.616                              |

|                |      |       |
|----------------|------|-------|
| M062X-D3       | 0.57 | 3.655 |
| LC-wPBE-D3BJ   | 0.62 | 3.980 |
| CAM-B3LYP-D3BJ | 0.69 | 3.968 |

**Table S6.** Dissociation energies and key structural parameters of (HgH<sub>2</sub>)<sub>2</sub> dimers with topology **2b** calculated at the DFT level of theory (BSSE corrected). The basis set Def2-TZVPPD was used for all functionals.

| Method         | DE (kcal/mol) | d <sub>Hg...Hg</sub> (Å) | Angle H-Hg...Hg (deg.) |
|----------------|---------------|--------------------------|------------------------|
| B3LYP-D3       | 4.38          | 3.738                    | 52.439                 |
| B3LYP-D3BJ     | 2.07          | 3.783                    | 54.657                 |
| PBEPBE-D3      | 3.47          | 3.677                    | 53.231                 |
| PBEPBE-D3BJ    | 3.07          | 3.588                    | 54.138                 |
| TPSSTPSS-D3    | 3.89          | 3.691                    | 52.120                 |
| TPSSh-D3       | 4.05          | 3.678                    | 52.093                 |
| wB97xD         | 3.44          | 3.889                    | 54.424                 |
| M06L-D3        | 2.65          | 3.585                    | 54.062                 |
| M062X-D3       | 2.93          | 3.601                    | 54.667                 |
| LC-wPBE-D3BJ   | 2.34          | 3.612                    | 54.587                 |
| CAM-B3LYP-D3BJ | 1.98          | 3.756                    | 54.777                 |

**Table S7.** Dissociation energies and key structural parameters of (HgH<sub>2</sub>)<sub>2</sub> dimers with topology **2c** calculated at the DFT level of theory (BSSE corrected). The basis set Def2-TZVPPD was used for all functionals.

#### Topology **2a**

| Method    | DE (kcal/mol) | d <sub>Hg...Hg</sub> (Å) |
|-----------|---------------|--------------------------|
| B3LYP     | 0.01          | > 10                     |
| PBEPBE    | 0.00          | 4.261                    |
| TPSSTPSS  | 0.01          | > 10                     |
| TPSSh     | 0.01          | > 10                     |
| M06L      | 0.35          | 3.612                    |
| M062X     | 0.51          | 3.646                    |
| LC-wPBE   | 0.01          | > 10                     |
| CAM-B3LYP | 0.01          | > 10                     |

#### Topology **2b**

| Method   | DE (kcal/mol) | d <sub>Hg...Hg</sub> (Å) |
|----------|---------------|--------------------------|
| B3LYP    | 0.21          | 3.993                    |
| PBEPBE   | 0.85          | 3.402                    |
| TPSSTPSS | 0.04          | 3.533                    |
| TPSSh    | 0.00          | 3.535                    |
| M06L     | 1.64          | 3.337                    |
| M062X    | 1.95          | 3.382                    |

|           |      |       |
|-----------|------|-------|
| LC-wPBE   | 0.00 | 3.651 |
| CAM-B3LYP | 0.20 | 3.595 |

Topology **2c**

| Method    | DE (kcal/mol) | $d_{\text{Hg}\cdots\text{Hg}}$ (Å) |
|-----------|---------------|------------------------------------|
| B3LYP     | 0.39          | 4.069                              |
| PBEPBE    | 1.48          | 3.684                              |
| TPSSTPSS  | 0.85          | 3.715                              |
| TPSSh     | 0.88          | 3.716                              |
| M06L      | 2.59          | 3.585                              |
| M062X     | 2.88          | 3.600                              |
| LC-wPBE   | 1.08          | 3.700                              |
| CAM-B3LYP | 0.94          | 3.826                              |

**Table S8.** Dissociation energies and key structural parameters of  $(\text{HgH}_2)_2$  dimers with topology **2a**, **2b** and **2c** fully optimized at the DFT level of theory (BSSE corrected) without dispersion correction term.

OPTIMIZED STRUCTURES

**Table S9.** Optimized cartesian coordinates of  $(\text{HgH}_2)_2$  dimers with topologies **2a**, **2b** and **2c**.

**2a**

|    |           |           |            |
|----|-----------|-----------|------------|
| Hg | 0.0181830 | -0.000047 | 0.0005597  |
| H  | 0.0188209 | -1.645563 | -0.0003879 |
| H  | 0.0191229 | 1.645468  | -0.0003879 |
| Hg | 3.5158170 | -0.000367 | 0.0000720  |
| H  | 3.5152582 | 0.000254  | 1.6455883  |
| H  | 3.5147979 | 0.000254  | -1.6454442 |

**2b**

|    |           |           |          |
|----|-----------|-----------|----------|
| Hg | 0.216992  | 0.000000  | 0.000000 |
| H  | -0.215016 | -1.644959 | 0.000000 |
| H  | -0.215016 | 1.644959  | 0.000000 |
| Hg | 3.750991  | 0.000000  | 0.000001 |
| H  | 3.749016  | -1.644959 | 0.000000 |
| H  | 3.749016  | 1.644959  | 0.000000 |

**2c**

|    |           |            |           |
|----|-----------|------------|-----------|
| Hg | -0.107536 | -0.1128713 | -0.000014 |
| H  | 0.901819  | -1.4201582 | 0.000014  |
| H  | -1.133615 | 1.1693399  | 0.000000  |
| Hg | 3.641536  | 0.1128713  | 0.000014  |
| H  | 4.667613  | -1.1693409 | -0.000014 |
| H  | 2.632181  | 1.4201591  | -0.000000 |

**Table S10.** Optimized cartesian coordinates of  $(\text{Hg}(\text{CH}_3)_2)_2$  dimers with topologies **2a**, **2b** and **2c**.

**2a**

|    |           |           |           |
|----|-----------|-----------|-----------|
| Hg | 0.577677  | -0.342599 | -0.057568 |
| C  | 0.577999  | -0.329760 | -2.132742 |
| H  | 1.459804  | 0.183590  | -2.516909 |
| H  | 0.577980  | -1.342889 | -2.534645 |
| H  | -0.303656 | 0.183701  | -2.517101 |
| C  | 0.577884  | -0.321700 | 2.017540  |
| H  | -0.303793 | 0.193249  | 2.399853  |
| H  | 0.577842  | -1.333260 | 2.423375  |
| H  | 1.459668  | 0.193137  | 2.399761  |
| Hg | 0.577631  | 3.031801  | -0.064305 |
| C  | -1.497512 | 3.015008  | -0.064304 |
| H  | -1.880780 | 2.499151  | -0.945036 |
| H  | -1.880798 | 2.502594  | 0.818428  |
| H  | -1.901349 | 4.027367  | -0.066285 |
| C  | 2.652776  | 3.014879  | -0.064270 |
| H  | 3.036025  | 2.502440  | 0.818461  |
| H  | 3.036034  | 2.498994  | -0.944988 |
| H  | 3.056674  | 4.027213  | -0.066247 |

**2b**

|    |           |           |           |
|----|-----------|-----------|-----------|
| Hg | 0.577694  | -0.541939 | -0.057197 |
| C  | -1.496271 | -0.547816 | -0.057360 |
| H  | -1.889205 | -0.040975 | -0.938380 |
| H  | -1.882112 | -1.567392 | -0.055412 |
| H  | -1.889368 | -0.037545 | 0.821605  |
| C  | 2.651658  | -0.547816 | -0.057359 |
| H  | 3.044755  | -0.037547 | 0.821606  |
| H  | 3.037499  | -1.567392 | -0.055413 |
| H  | 3.044593  | -0.040974 | -0.938379 |
| Hg | 0.577694  | 3.231128  | -0.064584 |
| C  | -1.496269 | 3.237030  | -0.064694 |
| H  | -1.889233 | 2.726772  | -0.943727 |
| H  | -1.889343 | 2.730100  | 0.816258  |
| H  | -1.882102 | 4.256609  | -0.066698 |
| C  | 2.651657  | 3.237030  | -0.064695 |
| H  | 3.044730  | 2.730100  | 0.816257  |
| H  | 3.044620  | 2.726772  | -0.943727 |
| H  | 3.037489  | 4.256609  | -0.066698 |



**2c**

|    |           |           |           |
|----|-----------|-----------|-----------|
| Hg | 0.818260  | -0.574498 | -0.057358 |
| C  | -0.981234 | -1.603993 | -0.054738 |
| H  | -1.571934 | -1.352509 | -0.935722 |
| H  | -0.822179 | -2.682308 | -0.052067 |
| H  | -1.571874 | -1.348139 | 0.825027  |
| C  | 2.631301  | 0.439441  | -0.059946 |
| H  | 2.736494  | 1.075428  | 0.819346  |
| H  | 3.461569  | -0.267402 | -0.058842 |
| H  | 2.735908  | 1.071983  | -0.941790 |
| Hg | 0.337130  | 3.263686  | -0.064660 |
| C  | -1.475850 | 2.249634  | -0.063275 |
| H  | -1.580455 | 1.613682  | -0.942664 |
| H  | -1.580975 | 1.617042  | 0.818470  |
| H  | -2.306159 | 2.956428  | -0.064872 |
| C  | 2.136562  | 4.293292  | -0.066071 |
| H  | 2.726939  | 4.041408  | 0.815015  |
| H  | 2.727554  | 4.037910  | -0.945736 |
| H  | 1.977440  | 5.371597  | -0.068264 |

**Table S11.** Optimized cartesian coordinates of  $(\text{Hg}(\text{CN})_2)_2$  dimers with topologies **2a** and **2c**.

**2a**

|    |          |           |           |
|----|----------|-----------|-----------|
| C  | 0.321825 | -0.492275 | -0.137642 |
| Hg | 0.282298 | -0.502278 | -2.134980 |
| Hg | 3.792960 | 1.534609  | -2.091802 |
| C  | 2.738078 | 3.231101  | -2.082195 |
| C  | 0.347269 | -0.451662 | -4.131030 |
| C  | 4.743533 | -0.222460 | -2.102702 |
| N  | 0.430097 | -0.396247 | -5.272534 |
| N  | 0.390064 | -0.460115 | 1.005718  |
| N  | 5.241878 | -1.254240 | -2.109532 |
| N  | 2.088899 | 4.175296  | -2.077225 |

**2c**

|    |           |           |           |
|----|-----------|-----------|-----------|
| C  | 1.219098  | -0.038505 | -0.520125 |
| Hg | -0.347508 | -1.207365 | -0.109110 |
| C  | -1.969843 | -2.360165 | 0.230232  |
| C  | -0.391759 | -3.139557 | 2.750917  |
| Hg | -2.013878 | -4.292730 | 3.089941  |
| C  | -3.580196 | -5.461992 | 3.500715  |
| N  | 2.106659  | 0.639168  | -0.776004 |
| N  | -2.811518 | -3.063476 | 0.564493  |
| N  | 0.449753  | -2.435996 | 2.416770  |
| N  | -4.467929 | -6.139307 | 3.756946  |

**Table S12.** Optimized cartesian coordinates of (Hg(Cl)<sub>2</sub>)<sub>2</sub> dimers with topologies **2a** and **2c**.

**2a**

|    |           |           |           |
|----|-----------|-----------|-----------|
| Hg | 0.000009  | 0.000006  | 1.793913  |
| Hg | -0.000006 | -0.000009 | -1.793913 |
| Cl | -0.000003 | 2.235907  | 1.733897  |
| Cl | 0.000011  | -2.235896 | 1.733912  |
| Cl | -2.235907 | 0.000003  | -1.733897 |
| Cl | 2.235897  | -0.000011 | -1.733912 |

**2b**

|    |           |           |           |
|----|-----------|-----------|-----------|
| Cl | 0.740295  | -0.699296 | 0.216317  |
| Hg | -1.494556 | -0.719863 | 0.241149  |
| Hg | -1.513760 | 1.508972  | -3.624466 |
| Cl | -3.748614 | 1.488505  | -3.599576 |
| Cl | -3.729598 | -0.717679 | 0.226424  |
| Cl | 0.721284  | 1.506705  | -3.609786 |

**2c**

|    |           |           |           |
|----|-----------|-----------|-----------|
| Cl | 1.091208  | -0.197288 | -0.389036 |
| Hg | -0.699791 | -1.482397 | 0.002669  |
| Cl | -2.574982 | -2.724875 | 0.262410  |
| Cl | 0.213585  | -2.775150 | 2.718544  |
| Hg | -1.661634 | -4.017586 | 2.978291  |
| Cl | -3.452662 | -5.302659 | 3.369989  |

**Table S13.** Optimized cartesian coordinates of (Hg(Br)<sub>2</sub>)<sub>2</sub> dimers with topologies **2a**, **2b** and **2c**.

**2a**

|    |          |           |           |
|----|----------|-----------|-----------|
| Br | 0.560547 | -0.355030 | 0.235237  |
| Hg | 0.513469 | -0.366789 | -2.133590 |
| Hg | 3.561951 | 1.399088  | -2.093246 |
| Br | 2.310640 | 3.410967  | -2.082022 |
| Br | 0.593769 | -0.304829 | -4.500731 |
| Br | 4.685898 | -0.686619 | -2.106178 |

**2b**

|    |           |           |           |
|----|-----------|-----------|-----------|
| Br | 0.872040  | -0.689857 | 0.200722  |
| Hg | -1.494853 | -0.711061 | 0.225990  |
| Hg | -1.513463 | 1.500172  | -3.609303 |
| Br | -3.880356 | 1.479018  | -3.584009 |
| Br | -3.861936 | -0.709605 | 0.212029  |
| Br | 0.853620  | 1.498676  | -3.595367 |

**2c**

|    |           |           |           |
|----|-----------|-----------|-----------|
| Br | 1.213231  | -0.098648 | -0.434322 |
| Hg | -0.689580 | -1.456324 | -0.025819 |
| Br | -2.694935 | -2.749656 | 0.196996  |
| Br | 0.333472  | -2.750267 | 2.784024  |
| Hg | -1.671885 | -4.043583 | 3.006844  |
| Br | -3.574578 | -5.401477 | 3.415144  |

**Table S14.** Optimized cartesian coordinates of (HgI<sub>2</sub>)<sub>2</sub> dimers with topologies **2a**, **2b** and **2c**.**2a**

|    |          |           |           |
|----|----------|-----------|-----------|
| I  | 0.593120 | -0.336822 | 0.413651  |
| Hg | 0.535468 | -0.354312 | -2.133233 |
| Hg | 3.539815 | 1.386367  | -2.093501 |
| I  | 2.187504 | 3.545405  | -2.081229 |
| I  | 0.629522 | -0.283517 | -4.678094 |
| I  | 4.740845 | -0.860333 | -2.108124 |

**2b**

|    |           |           |           |
|----|-----------|-----------|-----------|
| I  | 1.049854  | -0.720181 | 0.254202  |
| Hg | -1.494722 | -0.735718 | 0.268720  |
| Hg | -1.513594 | 1.524841  | -3.652026 |
| I  | -4.058170 | 1.509339  | -3.637491 |
| I  | -4.039378 | -0.741513 | 0.266536  |
| I  | 1.031062  | 1.530576  | -3.649879 |

**2c**

|    |           |           |           |
|----|-----------|-----------|-----------|
| I  | 1.381440  | 0.053723  | -0.518175 |
| Hg | -0.663684 | -1.408082 | -0.076317 |
| I  | -2.839665 | -2.770834 | 0.104167  |
| I  | 0.478226  | -2.729116 | 2.876820  |
| Hg | -1.697747 | -4.091886 | 3.057305  |
| I  | -3.742845 | -5.553759 | 3.499066  |

**Table S15.** Optimized cartesian coordinates of  $(\text{Hg}(\text{CF}_3)_2)_2$  dimers with topologies **2a** and **2c**.

**2a**

|    |           |           |           |
|----|-----------|-----------|-----------|
| Hg | 0.738556  | -0.424882 | 0.066396  |
| C  | 0.746609  | -0.523976 | -2.028871 |
| F  | 1.872273  | -1.056358 | -2.534324 |
| F  | -0.278325 | -1.231534 | -2.533503 |
| F  | 0.644794  | 0.723659  | -2.558714 |
| C  | 0.717464  | -0.172995 | 2.149072  |
| F  | 0.604732  | 1.145917  | 2.461862  |
| F  | -0.312539 | -0.790570 | 2.751593  |
| F  | 1.837250  | -0.606935 | 2.751544  |
| Hg | 0.415917  | 3.112708  | -0.186930 |
| C  | -1.662403 | 2.827089  | -0.195233 |
| F  | -2.259957 | 3.279287  | -1.310494 |
| F  | -1.955181 | 1.501271  | -0.118334 |
| F  | -2.285344 | 3.409651  | 0.843070  |
| C  | 2.509098  | 3.247861  | -0.168317 |
| F  | 3.059874  | 2.007723  | -0.087887 |
| F  | 3.017876  | 3.814008  | -1.275866 |
| F  | 2.989412  | 3.940991  | 0.877951  |

**2c**

|    |           |           |           |
|----|-----------|-----------|-----------|
| Hg | 0.343658  | -1.004668 | -0.056429 |
| C  | -1.367994 | -2.213143 | -0.053947 |
| F  | -2.146490 | -1.999273 | -1.132370 |
| F  | -1.066521 | -3.528387 | -0.054977 |
| F  | -2.142661 | -2.000091 | 1.027422  |
| C  | 2.075723  | 0.188747  | -0.058889 |
| F  | 2.139394  | 1.013751  | 1.018130  |
| F  | 3.215646  | -0.518911 | -0.057248 |
| F  | 2.139498  | 1.008957  | -1.139536 |
| Hg | 0.811733  | 3.693837  | -0.065486 |
| C  | -0.920308 | 2.500399  | -0.063606 |
| F  | -0.983935 | 1.675998  | -1.141070 |
| F  | -0.984109 | 1.679583  | 1.016599  |
| F  | -2.060240 | 3.208043  | -0.064855 |
| C  | 2.523361  | 4.902366  | -0.067592 |
| F  | 3.297084  | 4.694865  | 1.015529  |
| F  | 3.302811  | 4.683029  | -1.144227 |
| F  | 2.221844  | 6.217577  | -0.075594 |

**Table S16.** Optimized cartesian coordinates of  $(\text{Hg}(\text{SiH}_3)_2)_2$  dimers with topologies **2a**, **2b** and **2c**.

**2a**

|    |          |           |           |
|----|----------|-----------|-----------|
| Hg | 0.578004 | -0.251717 | -0.057734 |
| Si | 0.578021 | -0.211901 | -2.523345 |

|    |           |           |           |
|----|-----------|-----------|-----------|
| H  | 1.774657  | 0.494774  | -3.045919 |
| H  | 0.577931  | -1.581268 | -3.096862 |
| H  | -0.618503 | 0.494942  | -3.045954 |
| Si | 0.577546  | -0.202065 | 2.407712  |
| H  | -0.619079 | 0.506828  | 2.927303  |
| H  | 0.577350  | -1.569140 | 2.986664  |
| H  | 1.774073  | 0.506671  | 2.927738  |
| Hg | 0.577787  | 2.940938  | -0.064191 |
| Si | -1.887743 | 2.896121  | -0.063928 |
| H  | -2.409014 | 2.186407  | -1.259333 |
| H  | -2.408819 | 2.190218  | 1.133819  |
| H  | -2.464032 | 4.264321  | -0.066058 |
| Si | 3.043322  | 2.896274  | -0.064226 |
| H  | 3.564596  | 2.190410  | 1.133458  |
| H  | 3.564491  | 2.186591  | -1.259693 |
| H  | 3.619519  | 4.264512  | -0.066433 |

## 2b

|    |           |           |           |
|----|-----------|-----------|-----------|
| Hg | 0.577694  | -0.637832 | -0.057293 |
| Si | -1.885688 | -0.703897 | -0.057055 |
| H  | -2.462153 | -0.048209 | -1.256683 |
| H  | -2.353397 | -2.114386 | -0.054318 |
| H  | -2.462081 | -0.043556 | 1.140053  |
| Si | 3.041076  | -0.703898 | -0.057056 |
| H  | 3.617470  | -0.043559 | 1.140053  |
| H  | 3.508785  | -2.114387 | -0.054321 |
| H  | 3.617541  | -0.048208 | -1.256683 |
| Hg | 0.577693  | 3.327034  | -0.064879 |
| Si | -1.885689 | 3.393095  | -0.064991 |
| H  | -2.462081 | 2.732783  | -1.262116 |
| H  | -2.462149 | 2.737369  | 1.134620  |
| H  | -2.353405 | 4.803582  | -0.067722 |
| Si | 3.041075  | 3.393094  | -0.064990 |
| H  | 3.617535  | 2.737366  | 1.134620  |
| H  | 3.617468  | 2.732784  | -1.262116 |
| H  | 3.508792  | 4.803581  | -0.067720 |

## 2c

|    |           |           |           |
|----|-----------|-----------|-----------|
| Hg | 0.303291  | -0.967514 | -0.056418 |
| Si | -1.690087 | -2.404262 | -0.050724 |
| H  | -2.533696 | -2.154517 | -1.247051 |
| H  | -1.338327 | -3.847473 | -0.048955 |
| H  | -2.530364 | -2.150825 | 1.147204  |
| Si | 2.310027  | 0.464277  | -0.062416 |
| H  | 2.344474  | 1.368074  | 1.122470  |
| H  | 3.586544  | -0.292871 | -0.060284 |
| H  | 2.343562  | 1.360346  | -1.253097 |
| Hg | 0.852066  | 3.656749  | -0.065398 |
| Si | -1.154769 | 2.225083  | -0.065872 |
| H  | -1.188316 | 1.324400  | -1.253062 |

|    |           |          |           |
|----|-----------|----------|-----------|
| H  | -1.189346 | 1.325900 | 1.122518  |
| H  | -2.431233 | 2.982325 | -0.066754 |
| Si | 2.845601  | 5.093289 | -0.065047 |
| H  | 3.684375  | 4.846257 | 1.135265  |
| H  | 3.690644  | 4.836906 | -1.258964 |
| H  | 2.494050  | 6.536536 | -0.071560 |

**Table S17.** Optimized cartesian coordinates of  $(\text{Hg}(\text{SiMe}_3)_2)_2$  dimers with topologies **2a** and **2c**.

**2a**

|   |           |            |           |
|---|-----------|------------|-----------|
| C | 18.866075 | -11.621055 | 14.773972 |
| C | 16.662888 | -8.539042  | 13.246504 |
| C | 22.987708 | -8.704818  | 14.646081 |
| C | 20.656940 | -5.476480  | 13.733488 |
| C | 18.684602 | -12.106537 | 11.789627 |
| C | 15.973853 | -8.691964  | 16.191216 |
| C | 22.484865 | -7.242122  | 17.249954 |
| C | 22.020575 | -6.280641  | 11.152011 |
| C | 21.370374 | -12.266107 | 13.203220 |
| C | 16.693122 | -6.023335  | 14.927822 |
| C | 22.073072 | -10.248065 | 17.082259 |
| C | 19.022573 | -5.785666  | 11.206073 |
| H | 18.679193 | -12.687537 | 14.915988 |
| H | 15.601654 | -8.381085  | 13.043105 |
| H | 24.025098 | -8.834922  | 14.961356 |
| H | 20.861490 | -4.436484  | 13.470633 |
| H | 19.469113 | -11.277617 | 15.615782 |
| H | 17.227027 | -8.041088  | 12.456475 |
| H | 22.733553 | -9.543506  | 13.996224 |
| H | 19.750220 | -5.490330  | 14.340147 |
| H | 17.905907 | -11.106315 | 14.815044 |
| H | 16.858738 | -9.609376  | 13.177833 |
| H | 22.931780 | -7.790857  | 14.054333 |
| H | 21.481533 | -5.832012  | 14.351604 |
| H | 17.712215 | -11.618045 | 11.717435 |
| H | 16.147225 | -9.768075  | 16.226914 |
| H | 22.409230 | -6.274927  | 16.751826 |
| H | 22.898847 | -6.658445  | 11.676671 |
| H | 19.166846 | -12.029844 | 10.814517 |
| H | 16.133310 | -8.297379  | 17.195268 |
| H | 21.912146 | -7.183207  | 18.176126 |
| H | 21.950752 | -6.808612  | 10.200373 |
| H | 18.514129 | -13.164745 | 11.997721 |
| H | 14.926491 | -8.529501  | 15.928899 |
| H | 23.532340 | -7.403365  | 17.512554 |
| H | 22.186753 | -5.222965  | 10.937853 |
| H | 21.192143 | -13.329669 | 13.374232 |
| H | 15.636174 | -5.870593  | 14.700445 |
| H | 23.115143 | -10.382086 | 17.379425 |
| H | 19.213622 | -4.737708  | 10.966314 |
| H | 21.927605 | -12.165420 | 12.271241 |

|    |           |            |           |
|----|-----------|------------|-----------|
| H  | 16.898214 | -5.561270  | 15.894088 |
| H  | 21.461489 | -10.271790 | 17.984816 |
| H  | 18.863024 | -6.320153  | 10.269016 |
| H  | 22.005299 | -11.900967 | 14.010947 |
| H  | 17.275881 | -5.491669  | 14.175166 |
| H  | 21.790217 | -11.102334 | 16.466551 |
| H  | 18.095103 | -5.832639  | 11.777372 |
| Hg | 20.101886 | -8.920565  | 12.656636 |
| Hg | 19.481970 | -8.243330  | 15.545805 |
| Si | 19.742145 | -11.333104 | 13.135158 |
| Si | 17.101223 | -7.856149  | 14.943089 |
| Si | 21.861726 | -8.631398  | 16.150475 |
| Si | 20.460896 | -6.508089  | 12.173319 |

## 2c

|   |            |            |            |
|---|------------|------------|------------|
| C | -13.728758 | -9.298642  | -16.262308 |
| C | -19.412831 | -12.680525 | -16.741858 |
| C | -20.253089 | -4.786820  | -19.081324 |
| C | -25.935284 | -8.168780  | -19.570844 |
| C | -14.986053 | -7.080442  | -17.906345 |
| C | -19.098794 | -7.076684  | -17.473106 |
| C | -20.567499 | -10.392212 | -18.352076 |
| C | -24.681580 | -10.387269 | -17.924498 |
| C | -23.858401 | -9.991733  | -20.822244 |
| C | -21.081685 | -5.185455  | -16.186154 |
| C | -15.803999 | -7.476422  | -15.007170 |
| C | -18.585587 | -12.285220 | -19.637857 |
| H | -12.945380 | -8.606172  | -15.947474 |
| H | -19.428741 | -4.155466  | -18.743529 |
| H | -20.237468 | -13.312099 | -17.078536 |
| H | -26.718318 | -8.861024  | -19.887028 |
| H | -13.853122 | -10.043308 | -15.475276 |
| H | -18.557628 | -13.326335 | -16.539725 |
| H | -25.809321 | -7.424174  | -20.357679 |
| H | -21.108303 | -4.140946  | -19.283204 |
| H | -13.378909 | -9.815175  | -17.156859 |
| H | -19.709025 | -12.217222 | -15.799971 |
| H | -19.956316 | -5.249051  | -20.023555 |
| H | -26.286541 | -7.652117  | -18.676920 |
| H | -14.653143 | -7.542401  | -18.836598 |
| H | -18.780648 | -7.592835  | -18.380528 |
| H | -20.885317 | -9.875202  | -17.445031 |
| H | -25.015964 | -9.925155  | -16.994851 |
| H | -15.875394 | -6.489959  | -18.128452 |
| H | -19.262885 | -7.825713  | -16.696509 |
| H | -20.403545 | -9.643907  | -19.129402 |
| H | -23.792839 | -10.978054 | -17.700802 |
| H | -14.202814 | -6.396123  | -17.573828 |
| H | -18.284337 | -6.426256  | -17.150084 |
| H | -21.382127 | -11.042829 | -18.674287 |
| H | -25.464472 | -11.071328 | -18.258367 |
| H | -24.649727 | -10.681956 | -21.121740 |

|    |            |            |            |
|----|------------|------------|------------|
| H  | -20.249928 | -4.550084  | -15.875037 |
| H  | -15.012359 | -6.785969  | -14.709035 |
| H  | -19.417600 | -12.920806 | -19.947847 |
| H  | -22.941545 | -10.567592 | -20.693706 |
| H  | -21.285961 | -5.888914  | -15.378079 |
| H  | -16.721265 | -6.900839  | -15.134016 |
| H  | -18.381608 | -11.582695 | -20.446819 |
| H  | -23.698218 | -9.290838  | -21.642408 |
| H  | -21.961035 | -4.551365  | -16.304420 |
| H  | -15.962492 | -8.177425  | -14.186772 |
| H  | -17.706278 | -12.919317 | -19.519329 |
| Hg | -22.514334 | -7.569976  | -18.516155 |
| Hg | -17.151301 | -9.898433  | -17.311250 |
| Si | -24.333274 | -9.093343  | -19.241756 |
| Si | -20.664991 | -6.080974  | -17.783834 |
| Si | -15.331626 | -8.374559  | -16.588553 |
| Si | -19.001338 | -11.387861 | -18.040962 |
